# Supplementary material
Source: PubMed Central journal article supplement (PMC2771437)
Supplement: NIHMS125803-supplement-Supplementary.pdf [file NIHMS125803-supplement-Supplementary.pdf]

**Supplementary figure S1. Adenovirus mediated transduction of rAd[Mito-Scal-HA] in skeletal muscle. A:** Detection of eGFP 2 weeks after intramuscular injection of rAd[Mito-Scal-HA] (20x). **B:** Detection of HA immunoreactive material and eGFP at different times after injection of rAd[Mito-Scal-HA] (20x).

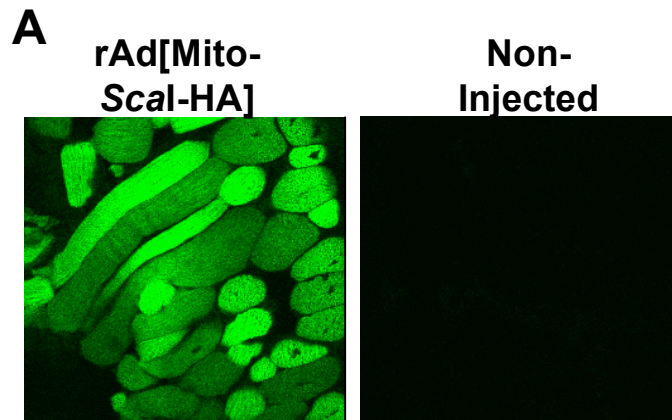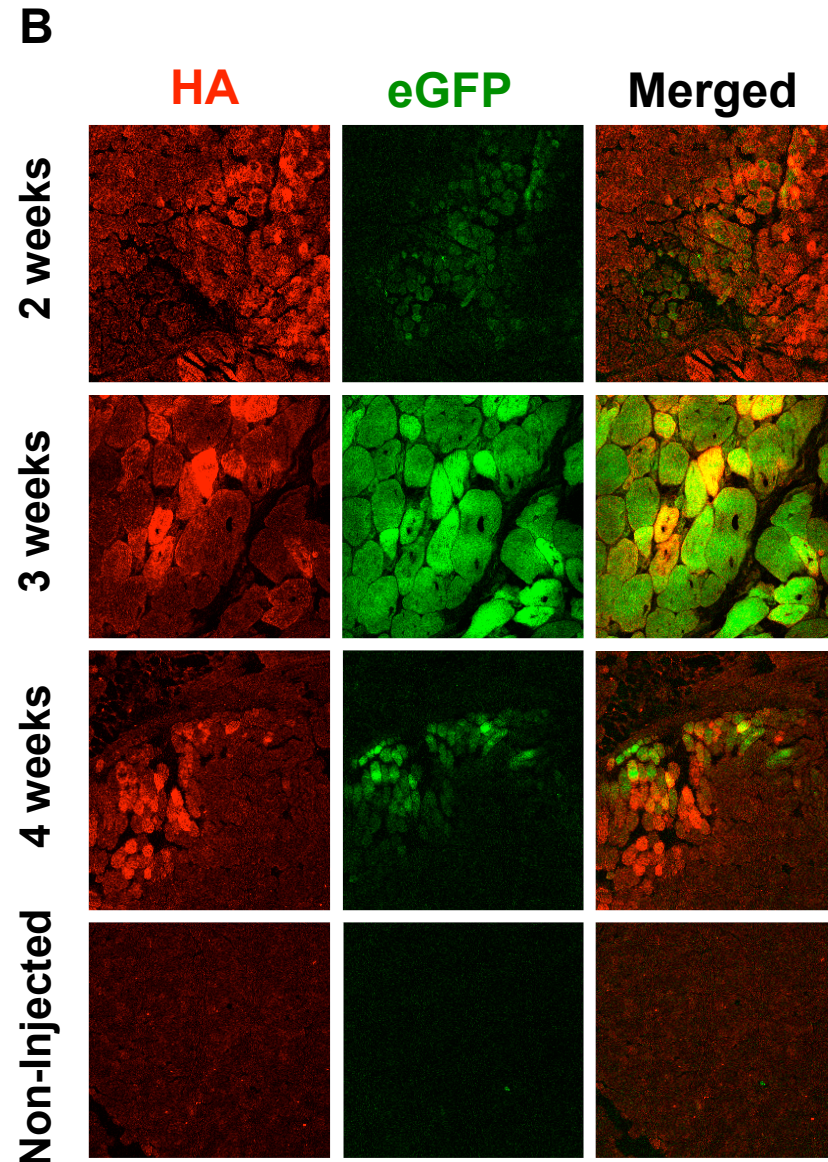

**Supplementary figure S2. rAd[Mito-Scal-HA] co-injected with fluorescence microspheres in muscle.** Muscle after 1 week injection with rAd[Mito-Scal-HA] with 0.25% fluorescence latex microspheres (2  $\mu$ m particles) to identify transduced muscle regions. Although the eGFP fluorescence was undetectable after 4 weeks, the injected area could be located by the presence of the red fluorescent beads.

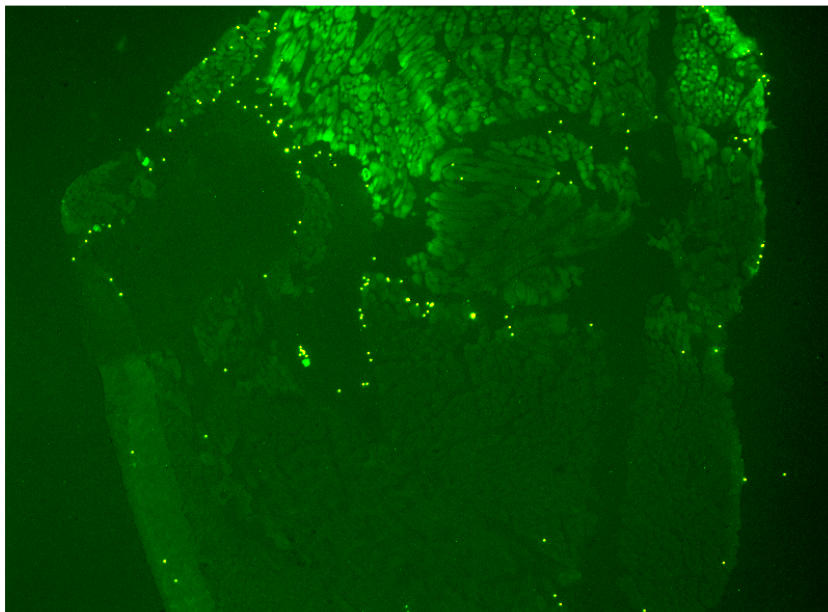

eGFP

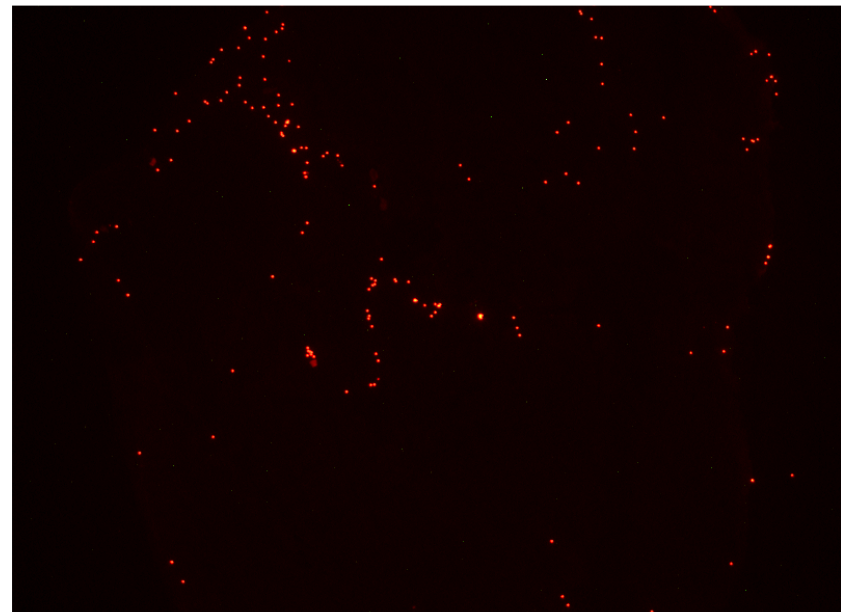

Microspheres
